# Supplementary material for: Evaluation of Global Fire Weather Database re-analysis andshort-term forecast products
Source: Copernicus journal article supplement (doi:10.5194/nhess-2019-197), 2019-07-02
Supplement: Supplementary file [file nhess-2019-197-AC2-supplement.pdf]

**I thank the second referee for their thoughtful and specific comments on the manuscript. Point by point responses with line numbers are listed below.**

Anonymous Referee #2

# General comments

The paper entitled “Evaluation of Global Fire Weather Database re-analysis and shortterm forecast products”, by R.B. Field, addresses the evaluation of reanalysis and forecast model-derived fire weather products of global coverage to provide a baseline for their application in impact studies. In particular, two main research questions are addressed:

1. All the FWI system components, as computed using the MERRA2 reanalysis, are compared against observational data from a global weather station network (n=1746) in terms of biases and their relationship with the input variables. 2. The skill of short-term FWI forecasts (up to 8-day lead time) based on the NASA GEOS-5 weather forecasting system is evaluated, considering the global observational database as reference.

This is an interesting paper, of undeniable scientific quality and relevance for the target journal. I would therefore recommend publication without major modifications.

I have elaborated a brief list of minor typos, and a few questions and suggestions. The article is well written and the results are presented with relevant tables and figures, and adequately discussed within the context of earlier research in the field. In my opinion it is a valuable contribution in the line of improving our understanding of the FWI system and to aid data users in its proper application, particularly when facing the need of using reanalysis data to this aim due to poor (or null) observational coverage, which is often the case in many impact and vulnerability assessment studies. The product here analyzed (GFWED) is of great relevance to this aim, and a thorough assessment of its advantages and limitations as compared to actual observational data is presented at a global scale. Furthermore, the assessment of the NASA GEOS-5 FWI forecast skill provides useful information for their application within operational and/or research context.

# Specific comments

I agree with the first referee in that the manuscript would gain from a unified description of the different databases/models involved in the analysis under the Data and Methods section, so the reader can get a more straightforward overview of the data involved (GWFED, MERRA-2, GEOS-5).

**L66: Thanks for the suggestion. As described in the response to the first reviewer, this has been added in the introduction.**

I also find confusing the alternative use of “GFWED” and “MERRA2 FWI” denominations throughout the text.

**Thank you for pointing this out. To make this clearer, I have omitted mentions of GFWED wherever possible. They appear mainly in the first half of the introduction, and only MERRA2 or GEOS-5 FWI are mentioned elsewhere.**

As a suggestion to the author, it would be also interesting a very short comment on the main differences between MERRA and the newer MERRA-2 (of course, nothing too technical), and if possible to mention in a nutshell what would be the expected improvement or most relevant

differences regarding the derived FWI product in both cases, apart from the citation to the work by Field et al. 2015 focused on the MERRA-based DC (L50-53).

**L66: Thank you for the suggestion. I have added a brief summary of the changes to MERRA2 from MERRA most relevant to precipitation, which among the FWI input variables, are discussed in most detail in Gelaro et al. (2017).**

The gaps in the input fire-weather variables TEMP, RH and WDSPD from the station data were completed using data from MERRA2 fields at the gridboxes of each station (and precipitation from CPC records), up to 20% gaps. This is probably the least bad option in the presence of missing data, although it is obviously “favoring“ the validation results at the gap-filled stations. Are the corresponding MERRA2 data being introduced directly, or is any form of bias correction being applied prior to that, so there is a smoother transition between actual records and MERRA2 values?

**L137: Any kind of systematic bias correction at the necessary diurnal scale was unfortunately beyond the scope of this study. To reduce the ‘favoring’ of gap-filled stations, I applied the further requirement beyond the initial quality screening that each daily record at each station only be included in the bias and correlation statistics if no more than 20% daily values RH (and thus also temperature) during the previous 60 days were interpolated from MERRA2 (to account for the current day’s weather inputs and also antecedent weather). This was done in the original analysis and is now mentioned in the manuscript.**

It is unclear what is the verifying reference against which GEOS-5 FWI forecasts have been validated (MERRA, MERRA2?). This should be made clear early in the manuscript.

**L158: Following the same comment from the first reviewer, the GEOS-5 forecasts at 1-8 day lead time are evaluated against the GEOS-5 analysis (0-day lead) fields, which is now mentioned in the manuscript.**

In L234 some outlying values over Pakistan are mentioned. Wouldn’t it be better to just discard these data with a detrimental influence on the validation results?

**L284: Thanks for the comment, that is a good point. Rather than remove the stations from the main analysis, I have mentioned in the text how the correlations over SEAS between DMC and BUI with FIRESEASON are reduced to  $r=-0.26$  and  $r=-0.22$  respectively when the four stations from Pakistan are omitted.**

The results obtained indicate the need for bias-correcting the MERRA-based FWI in many real-world applications (L371-373). With this regard, it might be worth mentioning that the correction of multi-variable indices has some intrinsic complexities that, for the particular case of FWI, have been previously addressed by other authors (see e.g. Casanueva et al. 2018)

**L475: Thank you for pointing out this very interesting and relevant study. We have mentioned the need for bias correction for real-world applications in the new Conclusions section, along with Yong et al. (2015) cited therein.**

The paper contains a lot of information from the validation of GFWED and GEOS5 forecasts. I agree with referee #1 that the manuscript would benefit from a final conclusions section summarizing the main results and conclusions.

**Thanks for the suggestion. I have added a Conclusions section.**

# Technical corrections

I have also suggested a few corrections to a few typos in the text, apart from those already indicated by the Referee #1

L24 “[...] is calculated temperature, relative humidity”... Is it perhaps the word ‘using’ missing here?

**Thank you for catching this, it has been corrected.**

L38 The reference to Cantin 2016 is missing in the reference list

**Thank you for catching this, it has been added.**

L48 needed instead of need?

**Thank you for catching this, it has been corrected.**

Table 2. I would suggest to include this information in the legend of Fig. 1, so this table can be eliminated.

**Thank you for the suggestion. Table 2 has been removed and the GFED acronyms and descriptions have been added to the caption of Figure 1.**

Table 3. The columns SNOWD and FIRESEASON are well understood, but these codes have not been previously described explicitly, neither in the text, nor in the table’s caption, so I would suggest to explicitly describe them prior to first using them.

**L224: Thank you for catching this. SNOWD and FIRESEASON have been defined at L250 in the text and in the caption of Table 2.**

L188-189 [...] across stations “for?” each of the GFED regions

**Thank you for catching this, it has been corrected.**

Fig. 13. Given the wide variability of FWI magnitude across the globe, did the author consider to use here relative instead of absolute biases?

**L217: Thanks for the suggestion. I did consider using relative biases (shown in the figure below), but decided on absolute biases for a more direct interpretation of the maps. The effect of taking the relative bias is now mentioned. The mean and biases in Tables 3-5 were included in part for more quantitative evaluation of the biases across the different GFED regions, which is now mentioned at L236.**

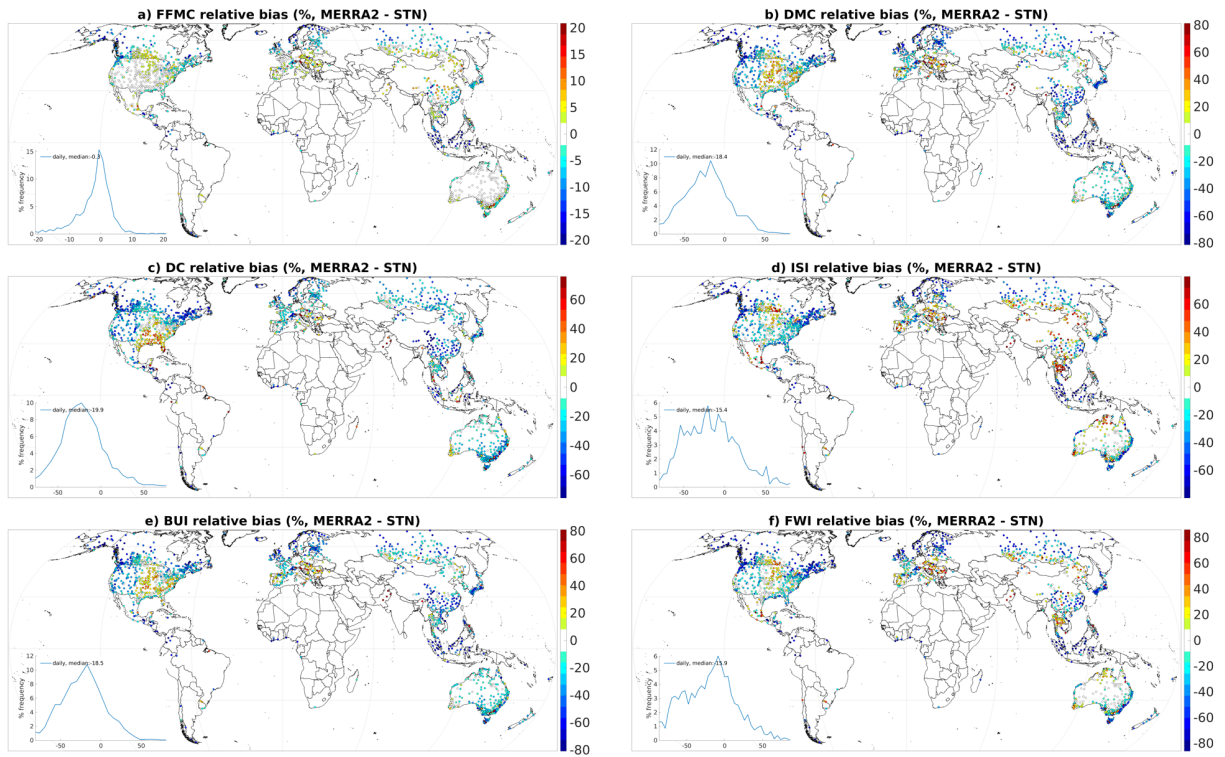

L402 Although “at” seasonal  
 Thank you for catching this, it has been corrected.

#### # References

Casanueva, A., Bedia, J., Herrera, S., Fernández, J., Gutiérrez, J.M., 2018. Direct and component-wise bias correction of multi-variate climate indices: the percentile adjustment function diagnostic tool. *Climatic Change* 147, 411–425. <https://doi.org/10.1007/s10584-018-2167-5>
